# Supplementary material for: Twisted MX2/MoS2heterobilayers: effect of van der Waals interaction on the electronic structure
Source: Royal Society of Chemistry journal article supplement (doi:10.1039/c7nr07746g), 2017-01-01
Supplement: c7nr07746g1.pdf [file c7nr07746g1.pdf]

Electronic Supplementary Information for

**Twisted MoS<sub>2</sub>/MX<sub>2</sub> heterobilayers: Effect of van der Waals interaction  
on the electronic structure**

Ning Lu<sup>1,\*</sup>, Hongyan Guo<sup>1</sup>, Zhiwen Zhuo<sup>2,3</sup>, Lu Wang<sup>2</sup>, Xiaojun Wu<sup>2,3</sup>, Xiao Cheng Zeng<sup>4,5,\*</sup>

<sup>1</sup>Anhui Province Key Laboratory of Optoelectric Materials Science and Technology, Department  
of Physics, Anhui Normal University, Wuhu, Anhui, 241000, China

<sup>2</sup>CAS Key Laboratory of Materials for Energy Conversion, School of Chemistry and Materials  
Sciences and CAS Center for Excellence in Nanoscience, University of Science and Technology  
of China, Hefei, Anhui 230026, China

<sup>3</sup>Hefei National Laboratory of Physical Sciences at the Microscale, University of Science and  
Technology of China, Hefei, Anhui 230026, China

<sup>4</sup>Department of Chemistry, University of Nebraska-Lincoln, Lincoln, NE 68588, USA

<sup>5</sup>Collaborative Innovation Center of Chemistry for Energy Materials, University of Science and  
Technology of China, Hefei, Anhui 230026, China

\*Email: luning@ahnu.edu.cn; xzeng1@unl.edu

**Table S1.** Computed lattice constant (in Å) and layer distance  $d$  (in Å) of the  $\text{MX}_2/\text{MoS}_2$  heterobilayers.

|                           | $0^\circ$ | $13.2^\circ$ | $21.8^\circ$ | $27.8^\circ$ | $32.2^\circ$ | $38.2^\circ$ | $46.8^\circ$ | $60^\circ$ |
|---------------------------|-----------|--------------|--------------|--------------|--------------|--------------|--------------|------------|
| <b>System</b>             | T         | $\sqrt{19}$  | $\sqrt{7}$   | $\sqrt{13}$  | $\sqrt{13}$  | $\sqrt{7}$   | $\sqrt{19}$  | C7         |
| <b>CrSe<sub>2</sub></b>   | 3.21      | 13.97        | 8.48         | 11.55        | 11.55        | 8.47         | 13.97        | 3.21       |
| <b>CrSe<sub>2</sub>_d</b> | 3.14      | 3.41         | 3.41         | 3.44         | 3.44         | 3.44         | 3.41         | 3.16       |
| <b>MoSe<sub>2</sub></b>   | 3.26      | 14.19        | 8.62         | 11.74        | 11.74        | 8.62         | 14.19        | 3.26       |
| <b>MoSe<sub>2</sub>_d</b> | 3.11      | 3.41         | 3.41         | 3.40         | 3.41         | 3.41         | 3.42         | 3.12       |
| <b>WSe<sub>2</sub></b>    | 3.26      | 14.20        | 8.62         | 11.75        | 11.75        | 8.62         | 14.20        | 3.26       |
| <b>WSe<sub>2</sub>_d</b>  | 3.11      | 3.41         | 3.41         | 3.41         | 3.41         | 3.41         | 3.41         | 3.11       |
| <b>WS<sub>2</sub></b>     | 3.19      | 13.91        | 8.44         | 11.50        | 11.50        | 8.44         | 13.91        | 3.19       |
| <b>WS<sub>2</sub>_d</b>   | 3.10      | 3.34         | 3.38         | 3.35         | 3.37         | 3.37         | 3.37         | 3.10       |
| <b>CrS<sub>2</sub></b>    | 3.13      | 13.65        | 8.28         | 11.28        | 11.28        | 8.28         | 13.64        | 3.13       |
| <b>CrS<sub>2</sub>_d</b>  | 3.10      | 3.35         | 3.36         | 3.35         | 3.36         | 3.36         | 3.36         | 3.18       |

**Table S2.** Computed direct bandgap  $E_{g1}$  (K-K, in eV) and indirect bandgap  $E_{g2}$  ( $\Gamma$ -K, in eV) of the  $\text{MX}_2/\text{MoS}_2$  heterobilayers.

|                                        | $0^\circ$ | $13.2^\circ$ | $21.8^\circ$ | $27.8^\circ$ | $32.2^\circ$ | $38.2^\circ$ | $46.8^\circ$ | $60^\circ$ |
|----------------------------------------|-----------|--------------|--------------|--------------|--------------|--------------|--------------|------------|
| <b>CrSe<sub>2</sub>_E<sub>g1</sub></b> | 0.76      | 0.76         | 0.76         | 0.77         | 0.77         | 0.77         | 0.76         | 0.76       |

|                                            |      |      |      |      |      |      |      |      |
|--------------------------------------------|------|------|------|------|------|------|------|------|
| <b>CrSe<sub>2</sub>_E<sub>g2</sub></b>     | 0.65 | 0.79 | 0.79 | 0.80 | 0.81 | 0.82 | 0.79 | 0.69 |
| <b>CrSe<sub>2</sub>_E<sub>g1_soc</sub></b> | 0.68 | 0.69 | 0.69 | 0.69 | 0.69 | 0.69 | 0.69 | 0.69 |
| <b>CrSe<sub>2</sub>_E<sub>g2_soc</sub></b> | 0.62 | 0.76 | 0.76 | 0.77 | 0.77 | 0.78 | 0.76 | 0.66 |
| <b>MoSe<sub>2</sub>_E<sub>g1</sub></b>     | 0.80 | 0.74 | 0.73 | 0.74 | 0.74 | 0.73 | 0.74 | 0.75 |
| <b>MoSe<sub>2</sub>_E<sub>g2</sub></b>     | 0.75 | 0.88 | 0.87 | 0.87 | 0.88 | 0.86 | 0.89 | 0.74 |
| <b>MoSe<sub>2</sub>_E<sub>g1_soc</sub></b> | 0.67 | 0.61 | 0.60 | 0.61 | 0.60 | 0.60 | 0.61 | 0.62 |
| <b>MoSe<sub>2</sub>_E<sub>g2_soc</sub></b> | 0.76 | 0.88 | 0.86 | 0.86 | 0.86 | 0.86 | 0.88 | 0.74 |
| <b>WSe<sub>2</sub>_E<sub>g1</sub></b>      | 0.62 | 0.55 | 0.54 | 0.54 | 0.54 | 0.54 | 0.55 | 0.57 |
| <b>WSe<sub>2</sub>_E<sub>g1</sub></b>      | 0.69 | 0.79 | 0.79 | 0.78 | 0.78 | 0.79 | 0.79 | 0.67 |
| <b>WSe<sub>2</sub>_E<sub>g1_soc</sub></b>  | 0.34 | 0.27 | 0.26 | 0.26 | 0.26 | 0.26 | 0.27 | 0.30 |
| <b>WSe<sub>2</sub>_E<sub>g2_soc</sub></b>  | 0.66 | 0.72 | 0.73 | 0.71 | 0.71 | 0.73 | 0.72 | 0.64 |
| <b>WS<sub>2</sub>_E<sub>g1</sub></b>       | 1.53 | 1.46 | 1.47 | 1.47 | 1.47 | 1.47 | 1.46 | 1.47 |
| <b>WS<sub>2</sub>_E<sub>g2</sub></b>       | 1.18 | 1.22 | 1.26 | 1.23 | 1.24 | 1.24 | 1.24 | 1.16 |
| <b>WS<sub>2</sub>_E<sub>g1_soc</sub></b>   | 1.27 | 1.21 | 1.21 | 1.21 | 1.21 | 1.21 | 1.21 | 1.22 |
| <b>WS<sub>2</sub>_E<sub>g2_soc</sub></b>   | 1.18 | 1.22 | 1.25 | 1.23 | 1.24 | 1.24 | 1.23 | 1.16 |
| <b>CrS<sub>2</sub>_E<sub>g1</sub></b>      | 0.61 | 0.62 | 0.66 | 0.67 | 0.67 | 0.66 | 0.63 | 0.64 |
| <b>CrS<sub>2</sub>_E<sub>g2</sub></b>      | 0.33 | 0.43 | 0.44 | 0.44 | 0.45 | 0.44 | 0.44 | 0.39 |
| <b>CrS<sub>2</sub>_E<sub>g1_soc</sub></b>  | 0.44 | 0.49 | 0.47 | 0.50 | 0.50 | 0.49 | 0.50 | 0.50 |
| <b>CrS<sub>2</sub>_E<sub>g2_soc</sub></b>  | 0.31 | 0.41 | 0.41 | 0.42 | 0.43 | 0.42 | 0.42 | 0.37 |

---

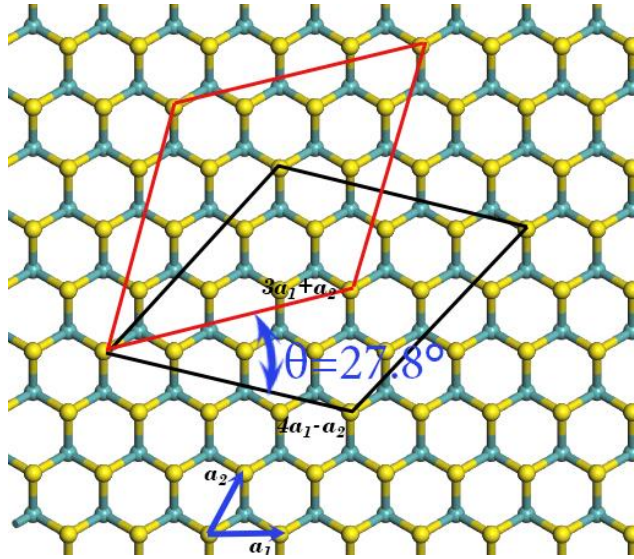

**Figure S1.** A schematic plot of the skewed supercell in a hexagonal lattice. The basis vector is  $(na_1+ma_2)$ . The rotation angle is  $\theta$ .

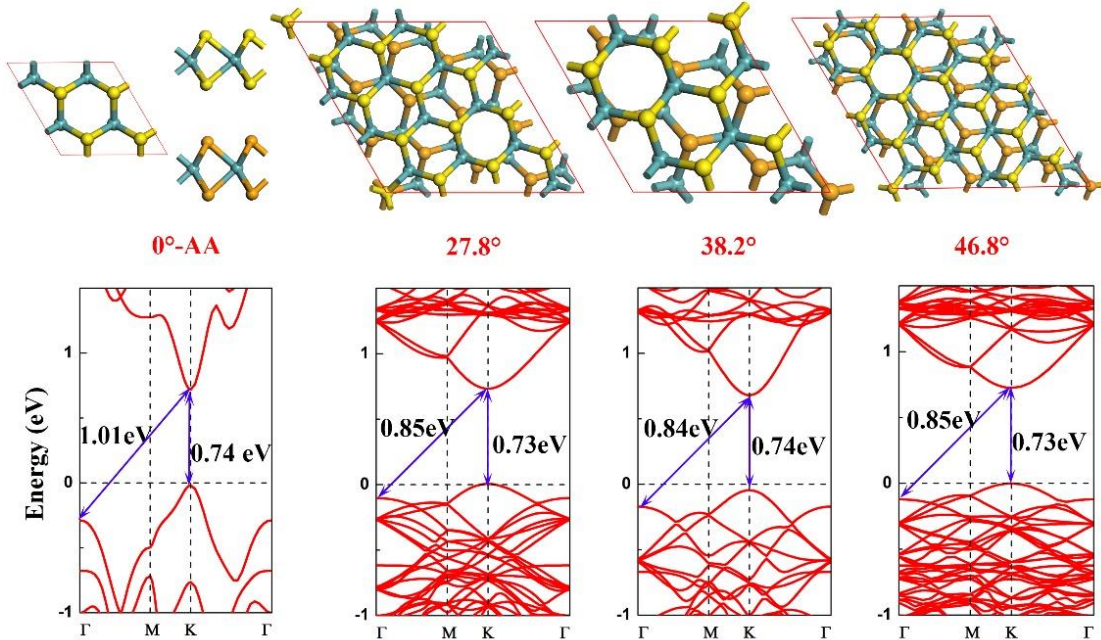

**Figure S2.** Atomic structures and band structures of the twisted heterobilayer  $\text{MoS}_2/\text{MoSe}_2$  with the AA stacking order as the initial configuration. The electronic properties versus the rotation angle are almost identical to those of the corresponding  $\text{MoS}_2/\text{MoSe}_2$  with the T-stacking order as the initial configuration.

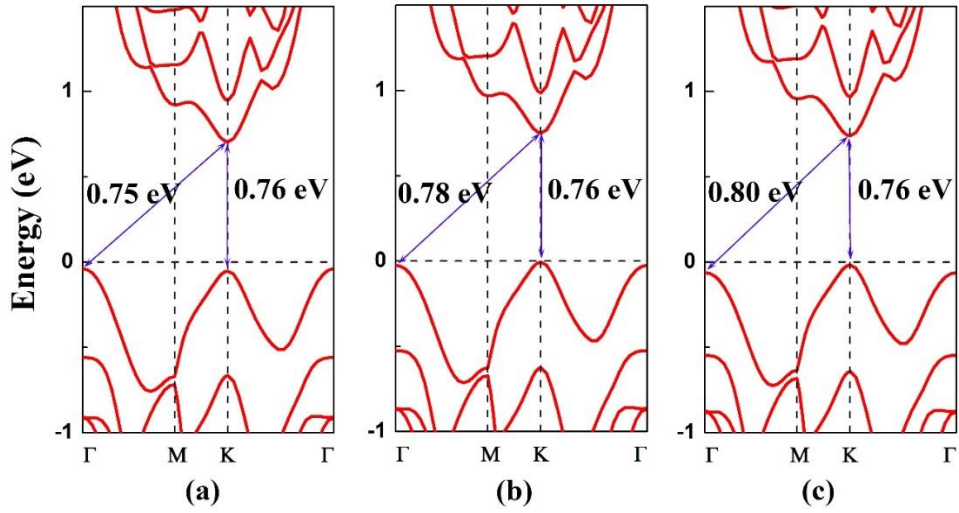

**Figure S3.** Computed band structures of the C7 stacking for CrSe<sub>2</sub>/MoS<sub>2</sub> heterobilayer with enlarging the interlayer distance to (a) 3.3 Å, (b) 3.4 Å and (c) 3.5 Å.

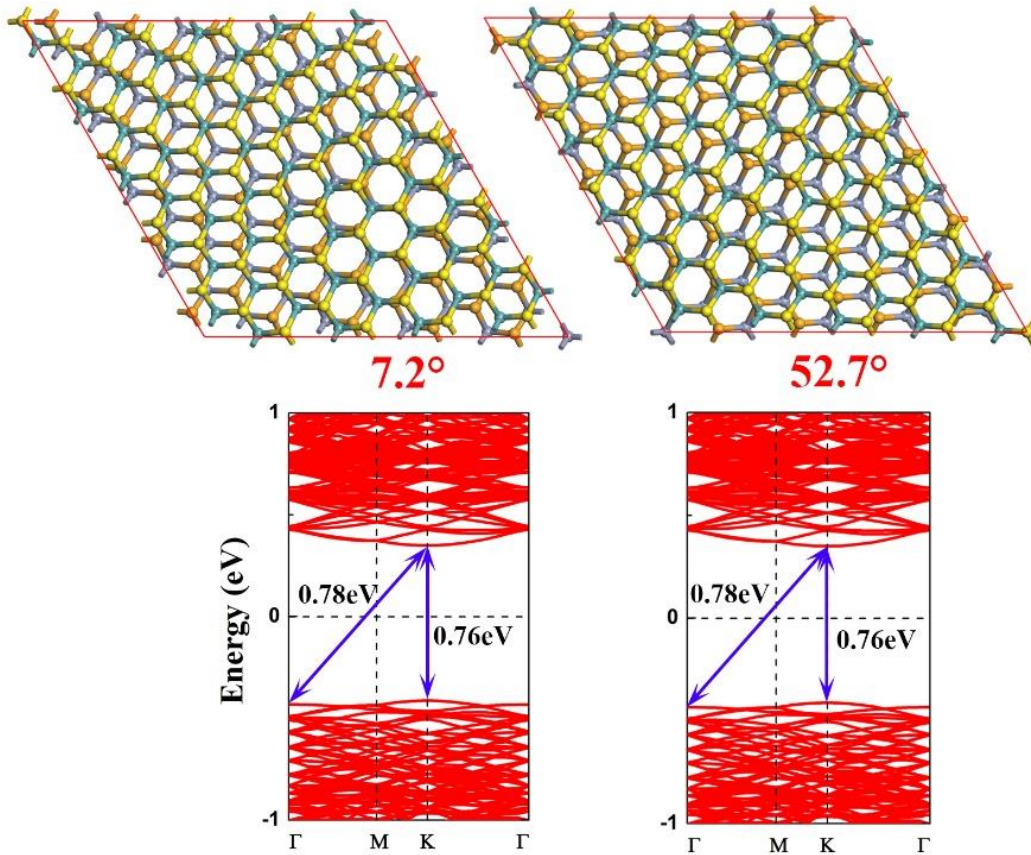

**Figure S4.** Computed band structures of CrSe<sub>2</sub>/MoS<sub>2</sub> heterobilayer with rotation angle of 7.2° and 52.7°. The interlayer distance is 3.40 Å for both 7.2° and 52.7°.

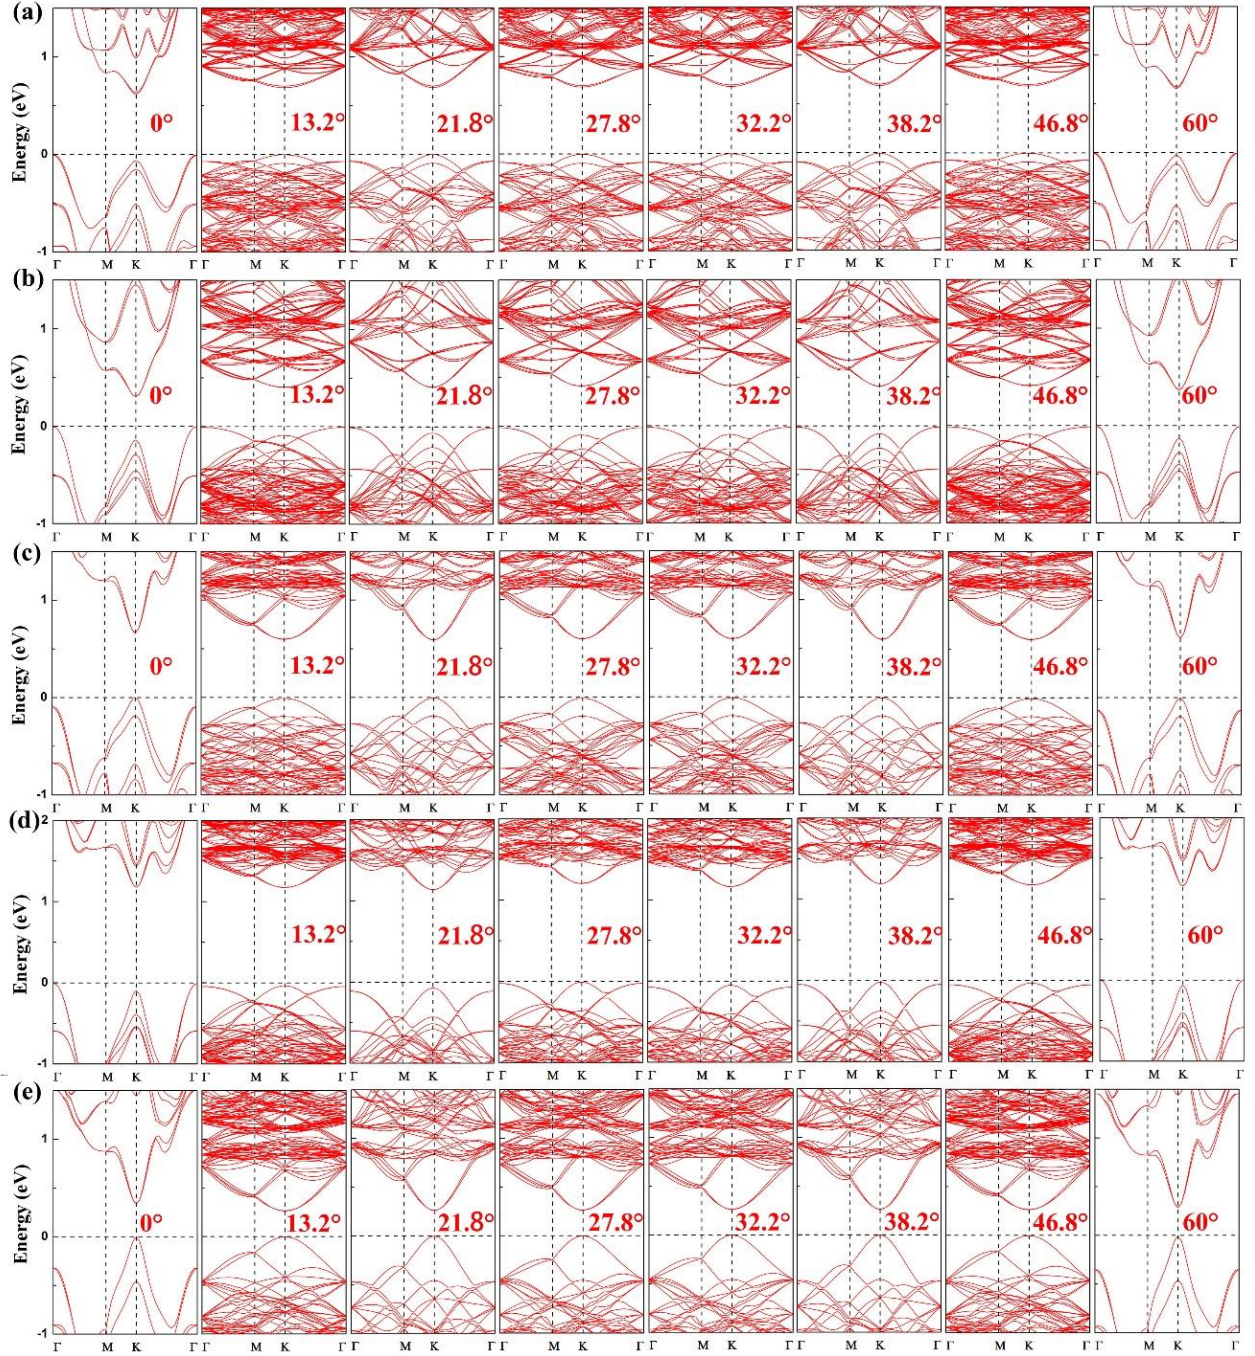

**Figure S5.** Computed band structures (PBE+SOC) of the heterobilayers of (a) CrSe<sub>2</sub>/MoS<sub>2</sub>, (b) CrS<sub>2</sub>/MoS<sub>2</sub>, (c) MoSe<sub>2</sub>/MoS<sub>2</sub>, (d) WS<sub>2</sub>/MoS<sub>2</sub>, and (e) WSe<sub>2</sub>/MoS<sub>2</sub>.
